# Supplementary material for: Field Experiences with Handheld Diagnostic Devices to Triage Children under Five Presenting with Severe Febrile Illness in a District Hospital in DR Congo
Source: MDPI journal article supplement (doi:10.3390/diagnostics12030746), 2022-03-18

**Supplementary Figure S1.** Key elements in the lifecycle of handheld diagnostic devices at the health-facility level, based on the WHO Technical Series on Medical Devices to ensure improved access, quality and use of medical products and technology [7, 15-23, 26, 27, 57, 76].

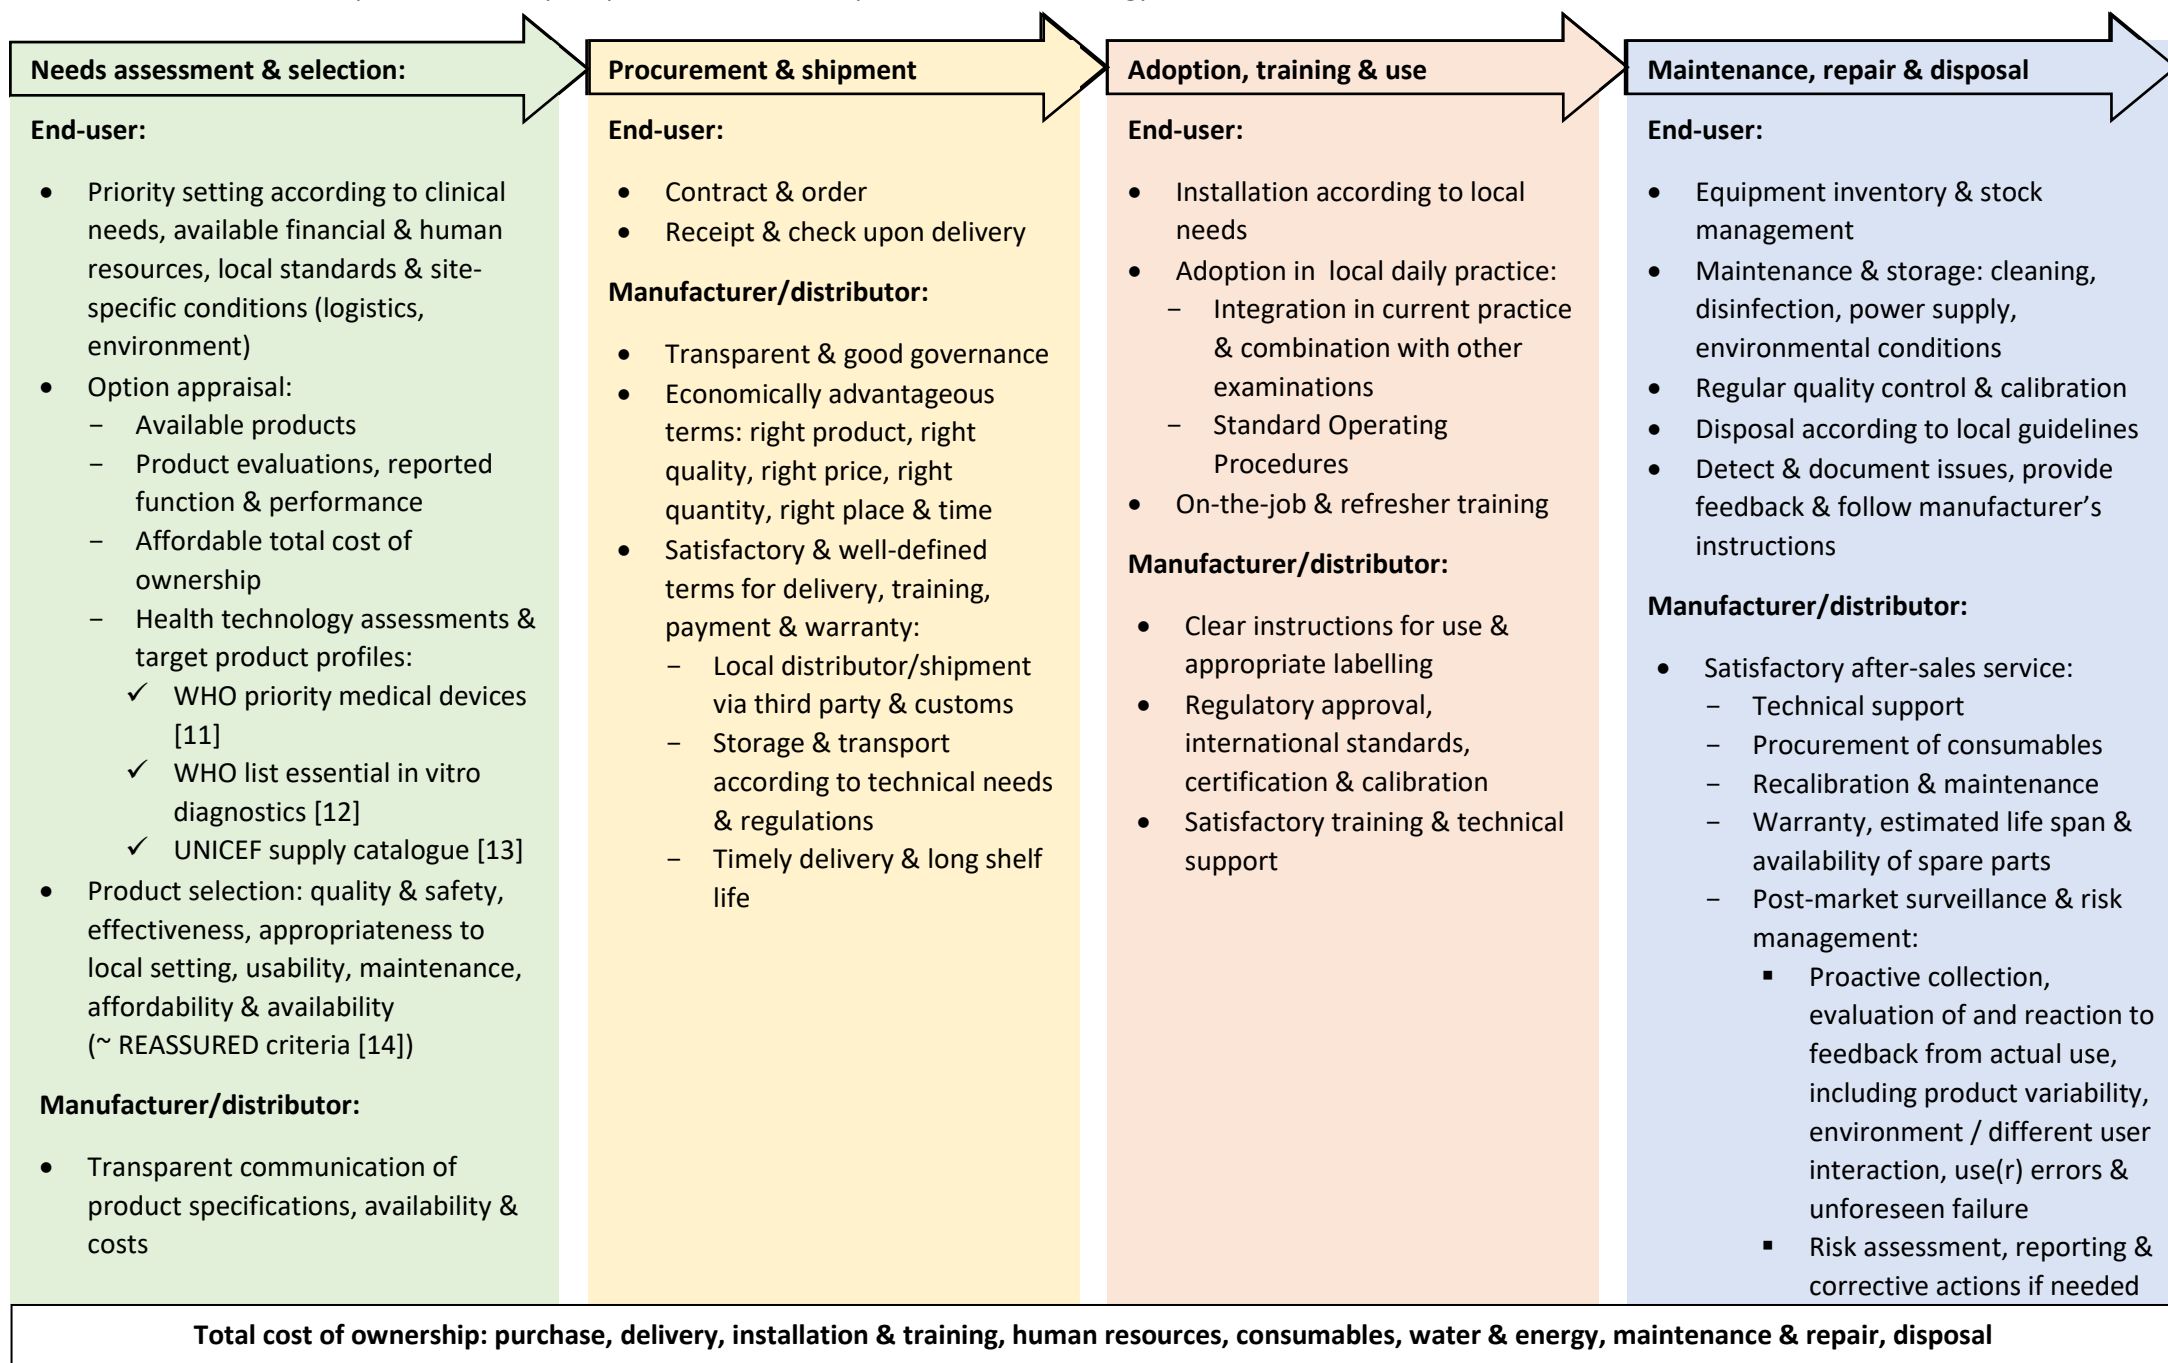

Supplement: s1 [file s1]
