# Supplementary material for: Field Experiences with Handheld Diagnostic Devices to Triage Children under Five Presenting with Severe Febrile Illness in a District Hospital in DR Congo
Source: Diagnostics (Basel). 2022 Mar 18;12(3):746. doi: 10.3390/diagnostics12030746 (PMC8947034; doi:10.3390/diagnostics12030746)
Supplement: Supplementary file 1 [file diagnostics-12-00746-s001.zip]

Archive with 7 entries (7 files):
- Supplement Proofs/220104_BT_Field experiences_S3.pdf
- Supplement Proofs/220104_BT_Field experiences_S4.pdf
- Supplement Proofs/220104_BT_Field experiences_S5.pdf
- Supplement Proofs/220104_BT_Field experiences_S6.pdf
- Supplement Proofs/220104_BT_Field experiences_S7.pdf
- Supplement Proofs/220317_BT_Field experiences_S1.pdf
- Supplement Proofs/220317_BT_Field experiences_S2.pdf
